# Supplementary material
Source: PubMed Central journal article supplement (PMC7731938)
Supplement: NIHMS1050172-supplement-Supp.pdf [file NIHMS1050172-supplement-Supp.pdf]

## Electronic Supplementary Material

# A novel near-infrared light responsive 4D printed nanoarchitecture with dynamically and remotely controllable transformation

Haitao Cui<sup>1,§</sup>, Shida Miao<sup>1,§</sup>, Timothy Esworthy<sup>1</sup>, Se-jun Lee<sup>1</sup>, Xuan Zhou<sup>1</sup>, Sung Yun Hann<sup>1</sup>, Thomas J. Webster<sup>2</sup>, Brent T. Harris<sup>3</sup>, and Lijie Grace Zhang<sup>1,4,5,6</sup> (✉)

<sup>1</sup> Department of Mechanical and Aerospace Engineering, The George Washington University, Washington, DC 20052, USA

<sup>2</sup> Department of Chemical Engineering, Northeastern University, Boston, MA 02115, USA

<sup>3</sup> Department of Neurology and Pathology, Georgetown University, Washington, DC 20007, USA

<sup>4</sup> Departments of Electrical and Computer Engineering, The George Washington University, Washington, DC 20052, USA

<sup>5</sup> Department of Biomedical Engineering, The George Washington University, Washington, DC 20052, USA

<sup>6</sup> Department of Medicine, The George Washington University, Washington, DC 20052, USA

<sup>§</sup> Haitao Cui and Shida Miao contributed equally to this work.

Supporting information to <https://doi.org/10.1007/s12274-019-2340-9>

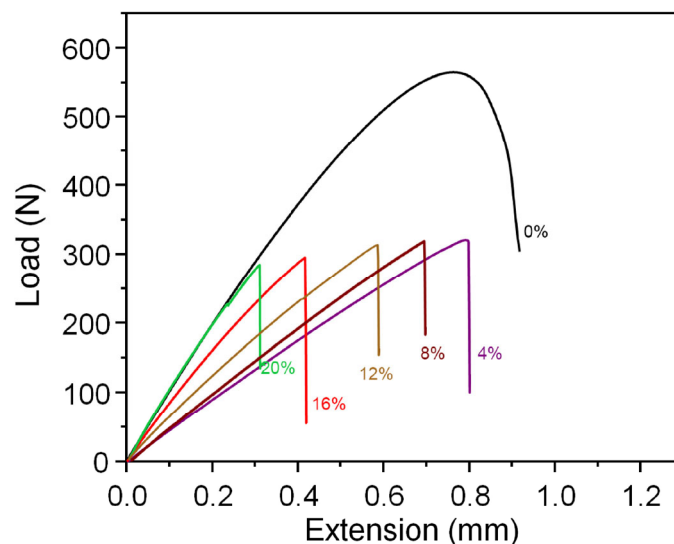

**Figure S1** Load-extension curves of the nanocomposite constructs with different graphene content and pure SMP characterized at room temperature via uniaxial tensile testing.

Address correspondence to [lgzhang@gwu.edu](mailto:lgzhang@gwu.edu)
